# Supplementary material
Source: MDPI journal article supplement (https://www.mdpi.com/2077-0472/13/1/154)
Supplement: s1 [file s1]

## Supplemental Material

### The effect of the genotypes of the *CSN2* gene on test-day milk yields in the Slovak Holstein cow

#### Supplemental material S1 – Genetics structure of Slovak Holstein cattle

**Table S1.** Genotype and allelic frequencies for *CSN2* gene in a population of Slovak Holstein cattle per breed.

| Herd         | Genotype frequencies |               |               | Allelic frequencies |               | $\chi^2$     | p             |
|--------------|----------------------|---------------|---------------|---------------------|---------------|--------------|---------------|
|              | A1A1                 | A1A2          | A2A2          | A1                  | A2            |              |               |
| Herd 1       | 0.1496               | 0.4567        | 0.3937        | 0.3780              | 0.6220        | 0.104        | 0.9491        |
| Herd 2       | 0.1379               | 0.4598        | 0.4023        | 0.3678              | 0.6322        | 0.011        | 0.9945        |
| Herd 3       | 0.0159               | 0.6984        | 0.2857        | 0.3651              | 0.6349        | 16.163       | 0.003         |
| Herd 4       | 0.0684               | 0.3632        | 0.5684        | 0.25                | 0.75          | 0.230        | 0.8914        |
| Herd 5       | 0.0310               | 0.3320        | 0.6370        | 0.1970              | 0.8030        | 2.337        | 0.3108        |
| <b>Total</b> | <b>0.0528</b>        | <b>0.3708</b> | <b>0.5764</b> | <b>0.2382</b>       | <b>0.7618</b> | <b>0.694</b> | <b>0.7069</b> |

**Table S2.** The population genetic indices for *CSN2* gene in a population of Slovak Holstein cattle per breed.

| Herd         | He <sub>(obs)</sub> | He <sub>(exp)</sub> | PIC           | E             | ENA           | V %          | F <sub>IS</sub> |
|--------------|---------------------|---------------------|---------------|---------------|---------------|--------------|-----------------|
| Herd 1       | 0.4567              | 0.4702              | 0.3596        | 0.5298        | 1.8875        | 47.39        | 0.0287          |
| Herd 2       | 0.4598              | 0.4650              | 0.3570        | 0.535         | 1.8692        | 47.04        | 0.0111          |
| Herd 3       | 0.6984              | 0.4636              | 0.3561        | 0.5364        | 1.8463        | 47.26        | -0.5065         |
| Herd 4       | 0.3632              | 0.3750              | 0.3047        | 0.625         | 1.6           | 37.66        | 0.0315          |
| Herd 5       | 0.3320              | 0.3164              | 0.2664        | 0.6836        | 1.4628        | 31.67        | -0.0493         |
| <b>Total</b> | <b>0.3708</b>       | <b>0.3629</b>       | <b>0.2971</b> | <b>0.6371</b> | <b>1.5696</b> | <b>36.31</b> | <b>-0.0218</b>  |

## Supplemental material S2 - Multiple comparisons between CSN2 genotype groups

**Table S3.** CSN2 genotype Least Squares Means comparisons - milk kg

| CSN<br>2 | Milk kg<br>LSMEAN | LSMEAN<br>Number |
|----------|-------------------|------------------|
| 11       | 32.6246680        | 1                |
| 12       | 32.8660110        | 2                |
| 22       | 33.0439772        | 3                |

---

*Least Squares Means for effect CSN2*  
 $Pr > |t|$  for  $H_0: LS\text{Mean}(i)=LS\text{Mean}(j)$

*Dependent Variable: Milk kg*

| <i>i/j</i> | 1      | 2      | 3      |
|------------|--------|--------|--------|
| 1          |        | 0.4280 | 0.0732 |
| 2          | 0.4280 |        | 0.1126 |
| 3          | 0.0732 | 0.1126 |        |

**Table S4.** CSN2 genotype Least Squares Means comparisons - fat kg

| CSN<br>2 | Fat kg<br>LSMEAN | LSMEAN<br>Number |
|----------|------------------|------------------|
| 11       | 1.18586792       | 1                |
| 12       | 1.18383171       | 2                |
| 22       | 1.18252520       | 3                |

---

*Least Squares Means for effect CSN2*  
 $Pr > |t|$  for  $H_0: LS\text{Mean}(i)=LS\text{Mean}(j)$

*Dependent Variable: Fat kg*

| <i>i/j</i> | 1      | 2      | 3      |
|------------|--------|--------|--------|
| 1          |        | 0.9646 | 0.9056 |
| 2          | 0.9646 |        | 0.9322 |
| 3          | 0.9056 | 0.9322 |        |

**Table S5.** CSN2 genotype Least Squares Means comparisons – fat %

| CSN<br>2 | Fat %<br>LSMEAN | LSMEAN<br>Number |
|----------|-----------------|------------------|
| 11       | 3.75156951      | 1                |
| 12       | 3.70272478      | 2                |
| 22       | 3.68289739      | 3                |

---

*Least Squares Means for effect CSN2*  
 $Pr > |t|$  for  $H_0: LS\text{Mean}(i)=LS\text{Mean}(j)$

*Dependent Variable: Fat %*

| <i>i/j</i> | 1      | 2             | 3             |
|------------|--------|---------------|---------------|
| 1          |        | <b>0.0242</b> | <b>0.0006</b> |
| 2          | 0.0242 |               | 0.0549        |
| 3          | 0.0006 | 0.0549        |               |

**Table S6.** CSN2 genotype Least Squares Means comparisons - protein kg

| CSN<br>2 | Protein kg<br>LSMEAN | LSMEAN<br>Number |
|----------|----------------------|------------------|
| 11       | 1.05678001           | 1                |
| 12       | 1.06083980           | 2                |
| 22       | 1.07193063           | 3                |

---

*Least Squares Means for effect CSN2*  
*Pr > |t| for H0: LSMean(i)=LSMean(j)*

*Dependent Variable: Protein kg*

| i/j | 1      | 2      | 3             |
|-----|--------|--------|---------------|
| 1   |        | 0.7946 | <b>0.0381</b> |
| 2   | 0.7946 |        | <b>0.0003</b> |
| 3   | 0.0381 | 0.0003 |               |

**Table S7.** CSN2 genotype Least Squares Means comparisons – protein %

| CSN2 | Protein %<br>LSMEAN | LSMEAN<br>Number |
|------|---------------------|------------------|
| 11   | 3.30155631          | 1                |
| 12   | 3.29569765          | 2                |
| 22   | 3.31511985          | 3                |

---

*Least Squares Means for effect CSN2*  
*Pr > |t| for H0: LSMean(i)=LSMean(j)*

*Dependent Variable: Protein %%*

| i/j | 1      | 2      | 3                |
|-----|--------|--------|------------------|
| 1   |        | 0.7653 | 0.2314           |
| 2   | 0.7653 |        | <b>&lt;.0001</b> |
| 3   | 0.2314 | <.0001 |                  |

**p < 0.05** significant differences, **p < 0.01** highly significant differences

# Supplemental material S3 - Multiple comparisons between herds

**Table S8.** Herd Least Squares Means comparisons - milk kg

| <b>Herd</b>  | <b>Milk kg</b> |                          |
|--------------|----------------|--------------------------|
|              | <b>LSMEAN</b>  | <b>LSMEAN<br/>Number</b> |
| <i>Herd1</i> | 36.8824538     | 1                        |
| <i>Herd2</i> | 33.9344846     | 2                        |
| <i>Herd3</i> | 26.8113516     | 3                        |
| <i>Herd4</i> | 34.0743805     | 4                        |
| <i>Herd5</i> | 32.5217566     | 5                        |

---

*Least Squares Means for effect Herd*  
 $Pr > |t| \text{ for } H_0: LS\text{Mean}(i)=LS\text{Mean}(j)$

*Dependent Variable: Milk kg*

| <i>i/j</i> | 1      | 2      | 3      | 4      | 5      |
|------------|--------|--------|--------|--------|--------|
| 1          |        | <.0001 | <.0001 | <.0001 | <.0001 |
| 2          | <.0001 |        | <.0001 | 0.9831 | <.0001 |
| 3          | <.0001 | <.0001 |        | <.0001 | <.0001 |
| 4          | <.0001 | 0.9831 | <.0001 |        | <.0001 |
| 5          | <.0001 | <.0001 | <.0001 | <.0001 |        |

**Table S9.** Herd Least Squares Means comparisons - fat kg

| <b>Herd</b>  | <b>Fat kg</b> |                          |
|--------------|---------------|--------------------------|
|              | <b>LSMEAN</b> | <b>LSMEAN<br/>Number</b> |
| <i>Herd1</i> | 1.29921928    | 1                        |
| <i>Herd2</i> | 1.19686961    | 2                        |
| <i>Herd3</i> | 0.98821177    | 3                        |
| <i>Herd4</i> | 1.22339508    | 4                        |
| <i>Herd5</i> | 1.21267898    | 5                        |

---

*Least Squares Means for effect Herd*  
 $Pr > |t| \text{ for } H_0: LS\text{Mean}(i)=LS\text{Mean}(j)$

*Dependent Variable: Fat kg*

| <i>i/j</i> | 1      | 2      | 3      | 4      | 5      |
|------------|--------|--------|--------|--------|--------|
| 1          |        | <.0001 | <.0001 | <.0001 | <.0001 |
| 2          | <.0001 |        | <.0001 | 0.0771 | 0.2406 |
| 3          | <.0001 | <.0001 |        | <.0001 | <.0001 |
| 4          | <.0001 | 0.0771 | <.0001 |        | 0.6790 |
| 5          | <.0001 | 0.2406 | <.0001 | 0.6790 |        |

**Table S10.** Herd Least Squares Means comparisons – fat %

| <b>Herd</b>  | <b>Fat %</b>  |                          |
|--------------|---------------|--------------------------|
|              | <b>LSMEAN</b> | <b>LSMEAN<br/>Number</b> |
| <i>Herd1</i> | 3.61123238    | 1                        |
| <i>Herd2</i> | 3.64520011    | 2                        |
| <i>Herd3</i> | 3.84887859    | 3                        |
| <i>Herd4</i> | 3.64731172    | 4                        |
| <i>Herd5</i> | 3.80936335    | 5                        |

| Least Squares Means for effect Herd<br><i>Pr</i> >   <i>t</i>   for <i>H</i> <sub>0</sub> : <i>LS</i> Mean( <i>i</i> )= <i>LS</i> Mean( <i>j</i> ) |        |        |        |        |        |
|----------------------------------------------------------------------------------------------------------------------------------------------------|--------|--------|--------|--------|--------|
| Dependent Variable: Fat %                                                                                                                          |        |        |        |        |        |
| <i>i/j</i>                                                                                                                                         | 1      | 2      | 3      | 4      | 5      |
| 1                                                                                                                                                  |        | 0.5266 | <.0001 | 0.4976 | <.0001 |
| 2                                                                                                                                                  | 0.5266 |        | <.0001 | 1.0000 | <.0001 |
| 3                                                                                                                                                  | <.0001 | <.0001 |        | <.0001 | 0.4475 |
| 4                                                                                                                                                  | 0.4976 | 1.0000 | <.0001 |        | <.0001 |
| 5                                                                                                                                                  | <.0001 | <.0001 | 0.4475 | <.0001 |        |

**Table S11.** Herd Least Squares Means comparisons - protein kg

| <i>Herd</i>  | <i>Protein kg</i> | <i>LS</i> MEAN |
|--------------|-------------------|----------------|
|              | <i>LS</i> MEAN    | <i>Number</i>  |
| <i>Herd1</i> | 1.15070013        | 1              |
| <i>Herd2</i> | 1.09367916        | 2              |
| <i>Herd3</i> | 0.93432596        | 3              |
| <i>Herd4</i> | 1.06880460        | 4              |
| <i>Herd5</i> | 1.06840756        | 5              |

  

| Least Squares Means for effect Herd<br><i>Pr</i> >   <i>t</i>   for <i>H</i> <sub>0</sub> : <i>LS</i> Mean( <i>i</i> )= <i>LS</i> Mean( <i>j</i> ) |        |        |        |        |        |
|----------------------------------------------------------------------------------------------------------------------------------------------------|--------|--------|--------|--------|--------|
| Dependent Variable: Protein kg                                                                                                                     |        |        |        |        |        |
| <i>i/j</i>                                                                                                                                         | 1      | 2      | 3      | 4      | 5      |
| 1                                                                                                                                                  |        | <.0001 | <.0001 | <.0001 | <.0001 |
| 2                                                                                                                                                  | <.0001 |        | <.0001 | 0.0182 | 0.0002 |
| 3                                                                                                                                                  | <.0001 | <.0001 |        | <.0001 | <.0001 |
| 4                                                                                                                                                  | <.0001 | 0.0182 | <.0001 |        | 1.0000 |
| 5                                                                                                                                                  | <.0001 | 0.0002 | <.0001 | 1.0000 |        |

**Table S12.** Herd Least Squares Means comparisons - protein %

| <i>Herd</i>  | <i>Protein %</i> | <i>LS</i> MEAN |
|--------------|------------------|----------------|
|              | <i>LS</i> MEAN   | <i>Number</i>  |
| <i>Herd1</i> | 3.17357861       | 1              |
| <i>Herd2</i> | 3.27121905       | 2              |
| <i>Herd3</i> | 3.57144039       | 3              |
| <i>Herd4</i> | 3.17548508       | 4              |
| <i>Herd5</i> | 3.32889988       | 5              |

  

| Least Squares Means for effect Herd<br><i>Pr</i> >   <i>t</i>   for <i>H</i> <sub>0</sub> : <i>LS</i> Mean( <i>i</i> )= <i>LS</i> Mean( <i>j</i> ) |        |        |        |        |        |
|----------------------------------------------------------------------------------------------------------------------------------------------------|--------|--------|--------|--------|--------|
| Dependent Variable: Protein %%                                                                                                                     |        |        |        |        |        |
| <i>i/j</i>                                                                                                                                         | 1      | 2      | 3      | 4      | 5      |
| 1                                                                                                                                                  |        | <.0001 | <.0001 | 0.9997 | <.0001 |
| 2                                                                                                                                                  | <.0001 |        | <.0001 | <.0001 | <.0001 |
| 3                                                                                                                                                  | <.0001 | <.0001 |        | <.0001 | <.0001 |
| 4                                                                                                                                                  | 0.9997 | <.0001 | <.0001 |        | <.0001 |
| 5                                                                                                                                                  | <.0001 | <.0001 | <.0001 | <.0001 |        |

**p** < 0.05 significant differences, **p** < 0.01 highly significant differences
